# Supplementary material for: Antibacterial and Antibiofilm Efficacy of Thyme (Thymus vulgaris L.) Essential Oil against Foodborne Illness Pathogens, Salmonella enterica subsp. enterica Serovar Typhimurium and Bacillus cereus
Source: MDPI journal article supplement (doi:10.3390/antibiotics12030485), 2023-02-28
Supplement: s1 [file s1]

**Table S1.** Antimicrobial susceptibility profile of *S. Typhimurium* ST1 and *B. cereus* BC3 food isolates.

| Antibacterial agents<br>(1 mg mL <sup>-1</sup> ) | MDIZ (mm)                 |                           |
|--------------------------------------------------|---------------------------|---------------------------|
|                                                  | <i>S. Typhimurium</i> ST1 | <i>B. cereus</i> BC3      |
| AMX                                              | 12.01 ± 0.01 <sup>a</sup> | 23.93 ± 0.74 <sup>a</sup> |
| AMP                                              | 10.67 ± 0.47 <sup>a</sup> | 15.50 ± 0.41 <sup>b</sup> |
| CAF                                              | 12.67 ± 0.47 <sup>a</sup> | 11.33 ± 0.47 <sup>c</sup> |
| GNT                                              | 16.38 ± 0.85 <sup>b</sup> | 8.50 ± 0.41 <sup>d</sup>  |

<sup>1</sup> MDIZ, mean diameter of the inhibition zone; AMX, amoxicillin; AMP, ampicillin; CAF, chloramphenicol; GNT, gentamicin.

<sup>2</sup> Results were obtained by agar well diffusion method; triplicate assays with independent cultures. The mean diameters of inhibition zone (in mm) is reported as mean values ± standard deviation.

<sup>3</sup> One-way ANOVA test with Tukey's post hoc test (p<0.05) was performed to evaluate statistical significance for multiple comparisons for each bacterial isolate. Different letters (a, b, c, d) indicate significant differences.
